# Supplementary material
Source: publisher figshare collection journal article supplement (https://acs.figshare.com/ndownloader/files/9579496)
Supplement: Supplementary file 1 [file 9579496]

## Two-photon Spectra of Chlorophylls and Carotenoid-Tetrapyrrole Dyads

Daniel A. Gacek <sup>a</sup>, Ana L. Moore <sup>b</sup>, Thomas A. Moore <sup>b</sup>, Peter Jomo Walla <sup>a,\*</sup>

<sup>a</sup> Technische Universität Braunschweig, Institute for Physical and Theoretical Chemistry, Department of Biophysical Chemistry, Gaußstraße. 17, 38106 Braunschweig, Germany

<sup>b</sup> School of Molecular Sciences and Center for Bioenergy and Photosynthesis, Arizona State University, Tempe, Arizona 85287-1604, United States

\* Author for correspondence, e-mail: pwalla@gwdg.de, Tel: +49-531-3915328, Fax: +49-531-3915352

### Supporting Information

*Influence of direct chlorophyll/tetrapyrrole two-photon excitation on the parameter*

$\Phi_{\text{Coupling}}^{\text{Car } S_1\text{-Chl}}$

Remember that the parameter  $\Phi_{\text{Coupling}}^{\text{Car } S_1\text{-Chl}}$  describing energy transfer between optically forbidden Car states and Chlorophyll/Tetrapyrroles is calculated from

$$F^{OPE} = \Phi^{Chl-Fl} \quad (1)$$

$$F^{TPE} = \Phi_{\text{Coupling}}^{\text{Car } S_1\text{-Chl}} \cdot \Phi^{Chl-Fl} \quad (2)$$

→

$$\Phi_{\text{Coupling}}^{\text{Car } S_1\text{-Chl}} = \frac{F^{TPE}}{F^{OPE}} \quad (3)$$

Here,  $\Phi^{\text{Chl-Fl}}$  is the fluorescence quantum yield of the corresponding chlorophyll or tetrapyrrole. For both types of excitation, TPE and OPE, only the chlorophyll/tetrapyrrole

fluorescence is observed. Therefore, additional direct chlorophyll TPE excitation would have been to be considered by

$$F^{OPE} = \Phi^{Chl-Fl} \quad (4)$$

$$F^{TPE} = (\Phi_{Coupling}^{Car S_1-Chl} + \Phi_{direct}^{Chl TPE}) \cdot \Phi^{Chl-Fl} \quad (5)$$

→

$$(\Phi_{Coupling}^{Car S_1-Chl} + \Phi_{direct}^{Chl TPE}) = \frac{F^{TPE}}{F^{OPE}} \quad (6)$$

Here,  $\Phi_{direct}^{Chl TPE}$  is the amount of direct chlorophyll two-photon excitation for a distinct wavelength in comparison to direct carotenoid two-photon excitation. From eq. 6 it is obvious, that this factor only leads to a constant offset when comparing two different values of  $\Phi_{Coupling}^{Car S_1-Chl}$ . For example, when there was initially 50 % direct chlorophyll two-photon excitation and 0% carotenoid to chlorophyll energy transfer then the initially observed value of

$$\frac{F^{TPE}}{F^{OPE}} = (\Phi_{Coupling}^{Car S_1-Chl} + \Phi_{direct}^{Chl TPE}) = 0 + 0.5 = 0.5$$

will increase to

$$\frac{F^{TPE}}{F^{OPE}} = (\Phi_{Coupling}^{Car S_1-Chl} + \Phi_{direct}^{Chl TPE}) = 0.5 + 0.5 = 1.0$$

for a rise of carotenoid to chlorophyll energy transfer to 50 % and to

$$\frac{F^{TPE}}{F^{OPE}} = (\Phi_{Coupling}^{Car S_1-Chl} + \Phi_{direct}^{Chl TPE}) = 1.0 + 0.5 = 1.5$$

for a rise of carotenoid to chlorophyll energy transfer to 100 %.

Without any direct chlorophyll two-photon excitation the following three values

$$\frac{F^{TPE}}{F^{OPE}} = \Phi_{Coupling}^{Car S_1-Chl} = 0.0$$

$$\frac{F^{TPE}}{F^{OPE}} = \Phi_{Coupling}^{Car S_1-Chl} = 0.5$$

$$\frac{F^{TPE}}{F^{OPE}} = \Phi_{Coupling}^{Car S_1-Chl} = 1.0$$

would be observed experimentally.

Thus, any direct chlorophyll or tetrapyrrole two-photon excitation will only lead to a constant offset when comparing different samples or changing carotenoid to chlorophyll/tetrapyrrole energy transfer efficiencies under otherwise identical conditions. (see also supplementary Figure S1)

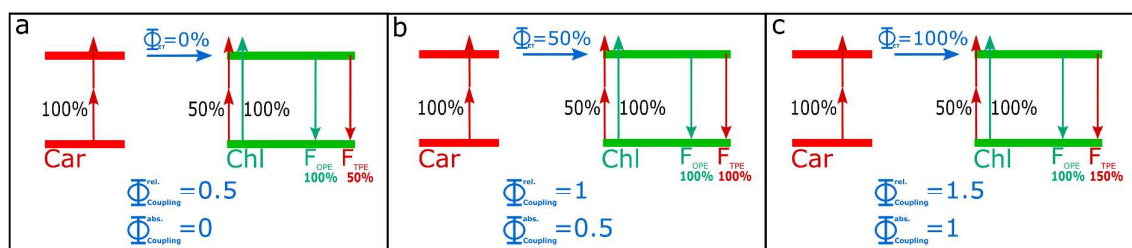

**Figure S1.** Direct chlorophyll two-photon excitation only leads to a constant offset in

$\Phi_{Coupling}^{Car S_1-Chl}$  but does not alter the general observation that increasing or decreasing

$\Phi_{Coupling}^{Car S_1-Chl}$  reflects increasing or decreasing Car to Chl energy transfer, respectively.
